# Supplementary material for: Aptamer-Mediated Up-conversion Core/MOF Shell Nanocomposites for Targeted Drug Delivery and Cell Imaging
Source: PubMed Central journal article supplement — Sci Rep. 2015 Jan 19;5:7851. doi: 10.1038/srep07851 (PMC4297973; doi:10.1038/srep07851), 2015-01-19
Supplement: srep07851-s1.pdf [file srep07851-s1.pdf]

## **Supplementary Information:**

### **Aptamer-Mediated Up-conversion Core/ MOF Shell Nanocomposites for Targeted Drug Delivery and Cell Imaging**

Kerong Deng<sup>1,2</sup>, Zhiyao Hou\*<sup>1</sup>, Xuejiao Li<sup>1</sup>, Chunxia Li<sup>1</sup>, Yuanxin Zhang<sup>1</sup>,  
Xiaoran Deng<sup>1,2</sup>, Ziyong Cheng<sup>1</sup> & Jun Lin \*<sup>1</sup>

<sup>1</sup> State Key Laboratory of Rare Earth Resource Utilization, Changchun Institute of Applied Chemistry, Chinese Academy of Sciences, Changchun 130022, P. R. China

<sup>2</sup> University of Chinese Academy of Sciences, Beijing 100049, P. R. China

The Supplementary Information includes:

Supplementary Figures S1-S8

## Supplementary Figures

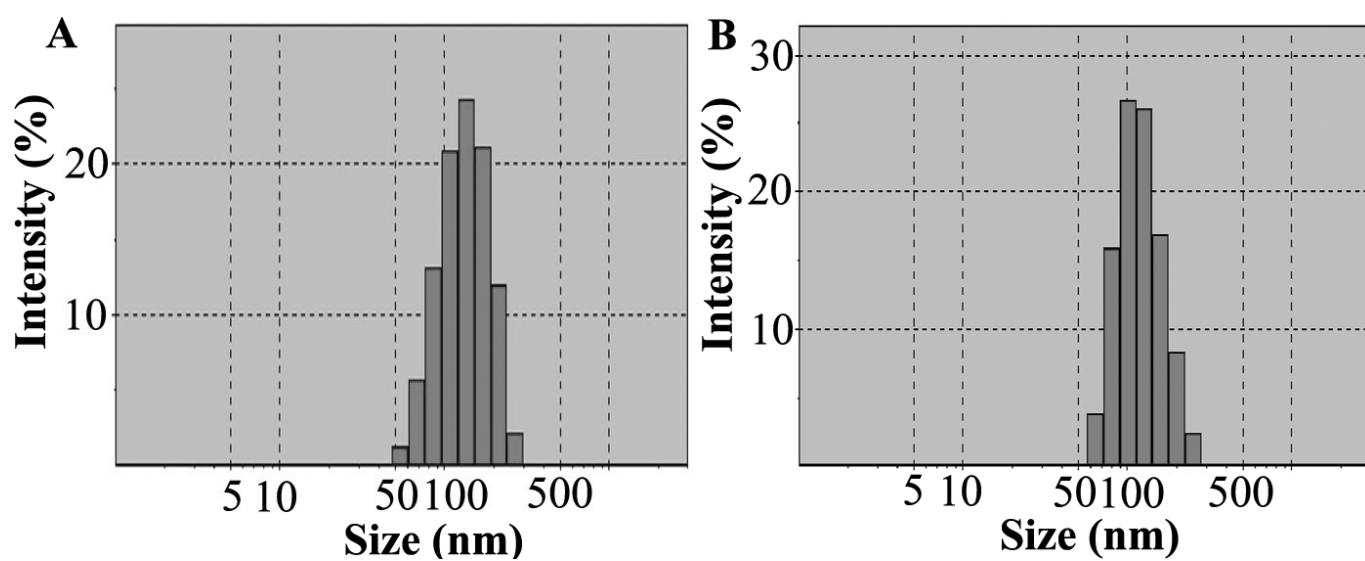

**Figure S1** Size distributions of UCNPs@MOF NCs in different physiological solutions (A: deionized water; B: cell culture media containing FBS).

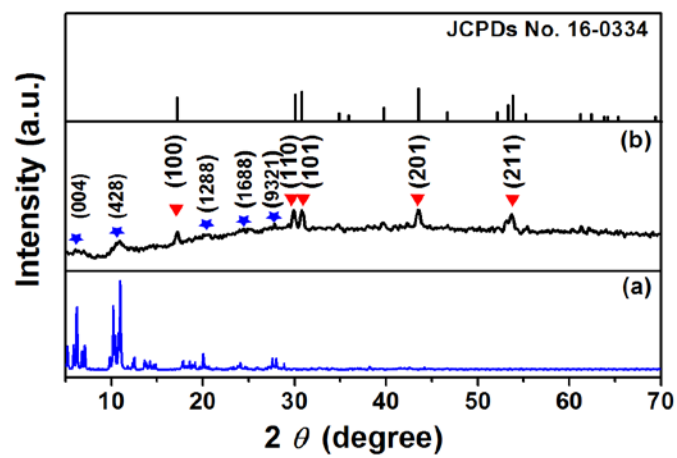

**Figure S2** The XRD patterns of UCNPs@MOF NCs (b) with the standard card of  $\beta$ -NaYF<sub>4</sub> (JCPDs No. 16-0334), and simulated from the crystallographic data of MIL-100(Fe) (a).

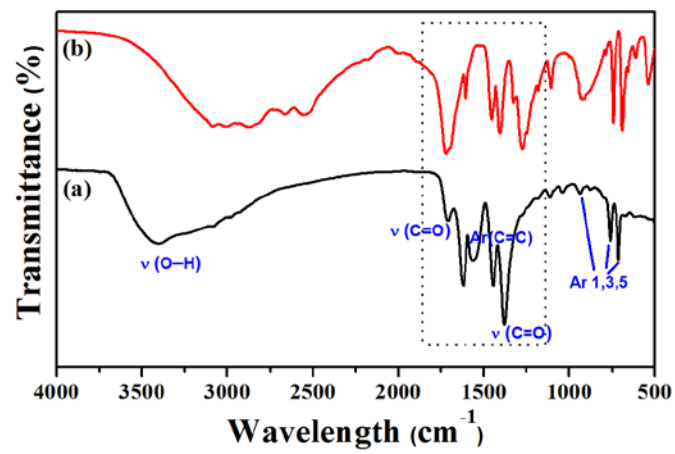

**Figure S3** FT-IR spectra of UCNPs@MOF NCs (a) and the raw material H<sub>3</sub>BTC (b).

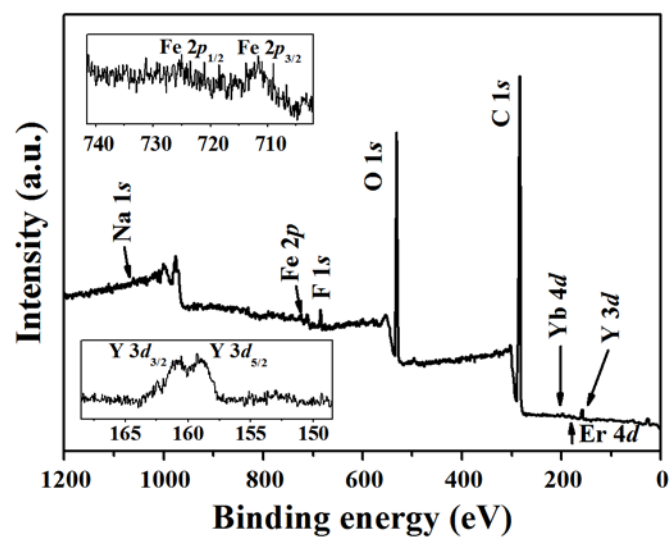

**Figure S4** XPS spectra of the core-shell UCNP@MOF NCs.

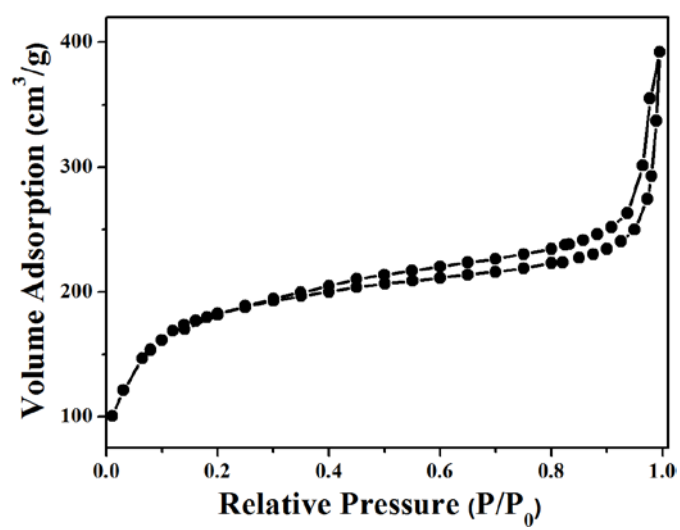

**Figure S5** N<sub>2</sub> adsorption/desorption isotherms for UCNPs@MOF NCs.

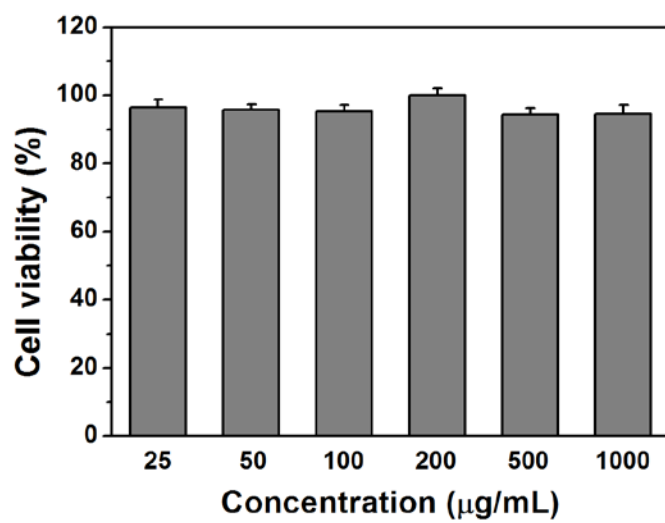

**Figure S6** Cell viability of 293 cells treated with UCNPs@MOF NCs.

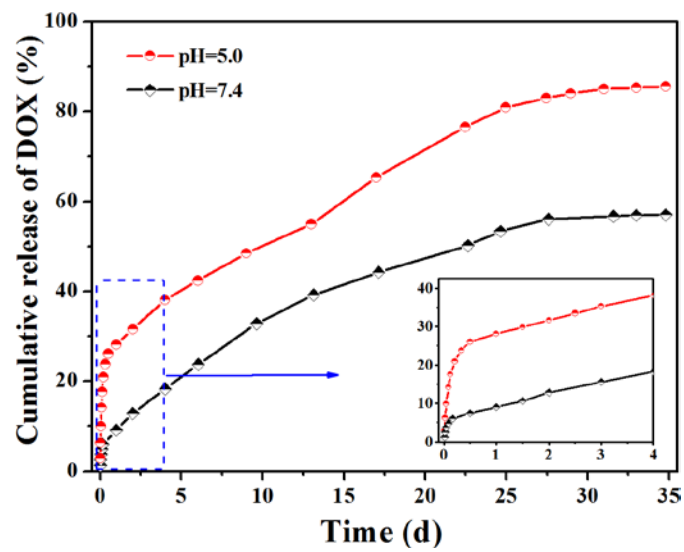

**Figure S7** Cumulative DOX release profiles of UCNPs@MOF-DOX in PBS buffer of different pH values (7.4 and 5.0) at 37 °C.



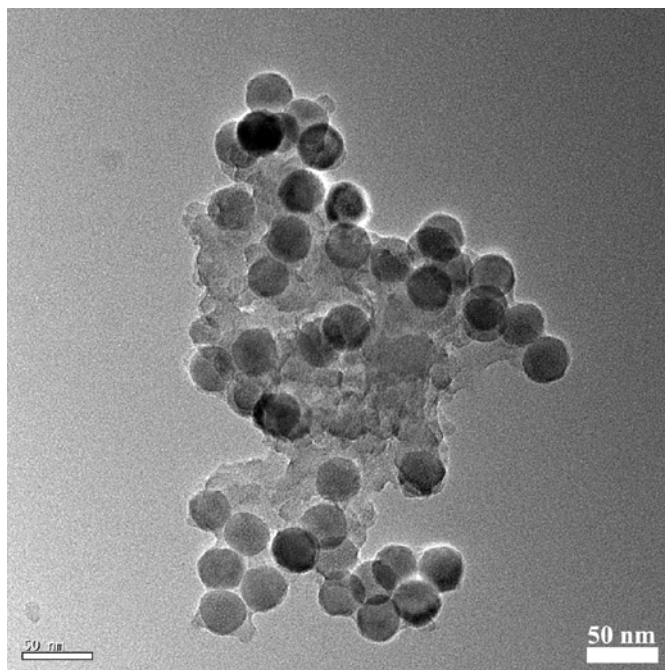

**Figure S8** TEM image of the as-obtained UCNPs@MOF NCs without PVP modified on the surface of UCNPs during the same synthesis process.
